# Supplementary material for: Evaluating thrombosis risk and patient-specific treatment strategy using an atherothrombosis-on-chip model
Source: Royal Society of Chemistry journal article supplement (doi:10.1039/d4lc00131a), 2024-01-01
Supplement: d4lc00131a1.pdf [file d4lc00131a1.pdf]

## **Supplementary information**

### **Evaluating thrombosis risk and patient-specific treatment strategy using an atherothrombosis-on-chip model**

Fahima Akther<sup>1,2</sup>, Hedieh Fallahi<sup>1</sup>, Jun Zhang<sup>1</sup>, Nam-Trung Nguyen<sup>1</sup>, Hang T. Ta<sup>1,2,3,\*</sup>

<sup>1</sup>Queensland Micro- and Nanotechnology, Griffith University, Nathan, Queensland 4111, Australia

<sup>2</sup>Australian Institute for Bioengineering and Nanotechnology, University of Queensland, St Lucia, Queensland 4072, Australia

<sup>3</sup>School of Environment and Science, Griffith University, Nathan, Queensland 4111, Australia

\* **Correspondence:** Hang T. Ta ([h.ta@griffith.edu.au](mailto:h.ta@griffith.edu.au))

#### **Flow rate calculation for mimicking physiological shear rate in the device**

The flow rate was calculated by using the following equation:

To convert the arterial shear rate (1,000 s<sup>-1</sup>) into flow rate, we used Newton's law of viscosity.

Briefly,

Newton's law of viscosity:

$$\tau = \eta \times \frac{dv}{dx}$$

Where,

$\tau$  = shear stress

$\eta$  = viscosity (Pa.s)

$\frac{dv}{dx}$  = shear rate (s<sup>-1</sup>)

dyn/cm<sup>2</sup> is often used as dynamic viscosity unit instead of Pa.s in the cardiovascular system.

Since 1 Pa = 10 dyn.s/cm<sup>2</sup>,

The dynamic viscosity of the blood = 3 × 10<sup>-3</sup> Pa.s

$$= 3 \times 10^{-2} \text{ dyn.s/cm}^2$$

Since the shear rate is 1,000 s<sup>-1</sup>, the shear stress is calculated as,

$$\tau = 3 \times 10^{-2} \text{ dyn.s/cm}^2 \times 1,000 \text{ s}^{-1}$$

$$= 30 \text{ dyn/cm}^2 \dots \dots \dots (1)$$

The shear stress was calculated using the following equation [1-4]

$$\tau = \frac{6\eta Q}{h^2 w} \dots \dots \dots (2)$$

Here,

$\tau$ : shear stress

$h$ : height of the channel = 50 μm = 0.005 cm

$w$ : width of the channel = 200 μm = 0.02 cm

$\eta$ : dynamic viscosity of the blood (dyn.s/cm<sup>2</sup>) = 3 × 10<sup>-2</sup> dyn.s/cm<sup>2</sup>

$Q$ : Flow rate

By rearranging equation 2 and taking the value from equation 1,

$$Q = \frac{\tau(h^2 w)}{6\eta} = \frac{30 \text{ dyn/cm}^2 (0.005)^2 \text{ cm}^2 \times 0.02 \text{ cm}}{6 (3 \times 10^{-2} \frac{\text{dyn.s}}{\text{cm}^2})} = 8.33 \times 10^{-5} \text{ cm}^3 / \text{s}$$

We know,  $1 \text{ cm}^3 = 1 \text{ mL}$ ,

$$Q = 8.33 \times 10^{-5} \text{ cm}^3/\text{s} = 8.33 \times 10^{-5} \text{ ml/s} = 4.998 \text{ }\mu\text{L}/\text{min}$$
